# Supplementary material for: ALDH2 Inhibition Potentiates High Glucose Stress-Induced Injury in Cultured Cardiomyocytes
Source: Hindawi journal article supplement (doi:10.1155/2016/1390861), 2016-01-01

# Supplementary

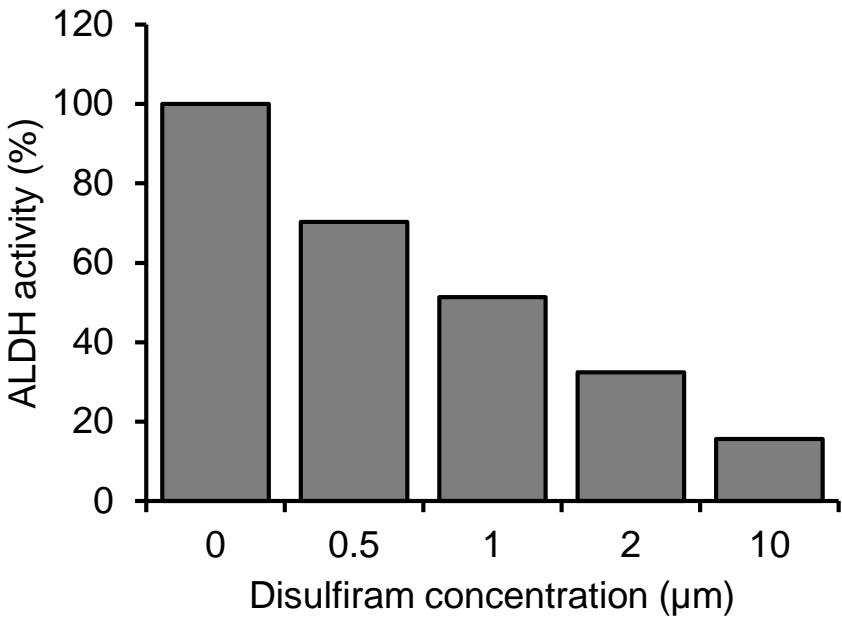

**Supplementary figure 1:** Dose-response curve of disulfiram with ALDH2 activity in H9c2 cells.

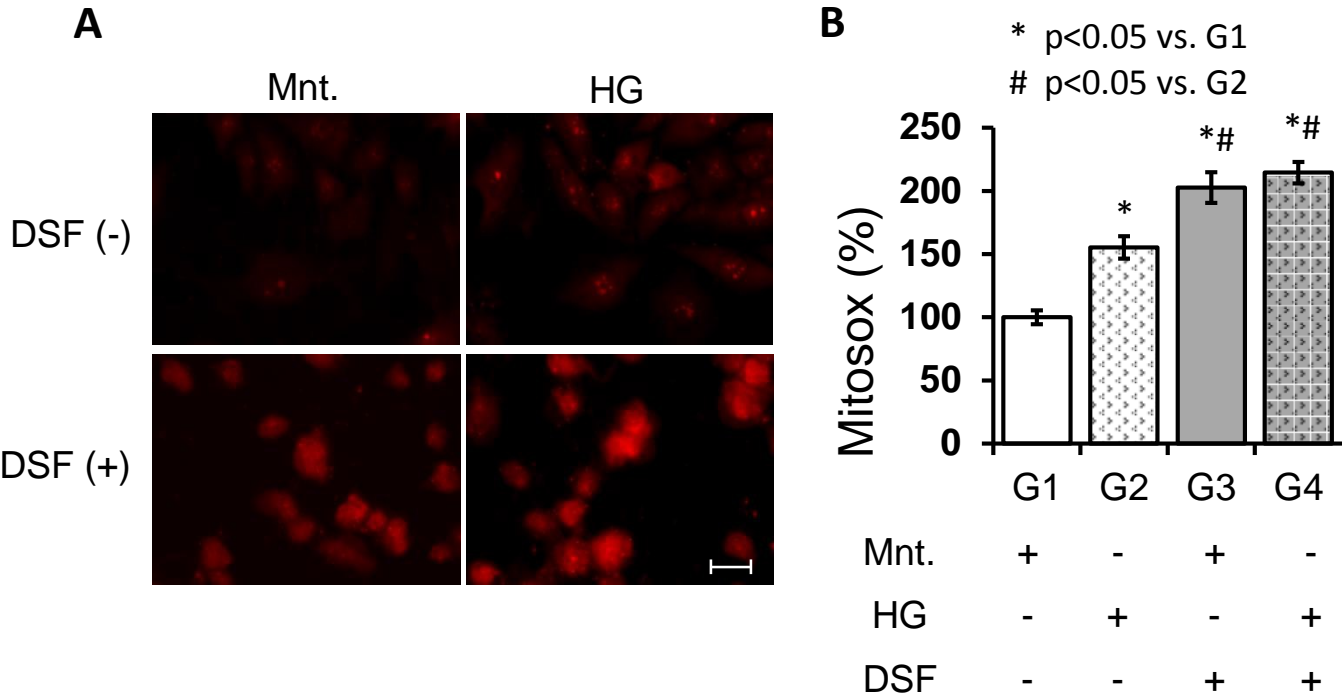

Supplement: f1 [file 1390861.f1.pdf]
